# Supplementary material for: An Archaeometric Analysis of Black-Appearing Iron Age Glass Beads from Vinha das Caliças 4 (Portugal)
Source: MDPI journal article supplement (doi:10.3390/heritage7030061), 2024-02-29
Supplement: s1 [file s1]

Table S1. Results of LA-ICP-MS analyses of NIST610 (n = 60) and NIST612 (n = 36) reference materials, including average measured values (ppm), standard deviations (ppm), RSD (%) and RD (%) calculated after D'Oriano et al. [124], minimum estimated detection limits (DL), and recovery rates relative to certified values [125]. Certified values reported from Pearce et al. 1997 [125].

| Element                              | <sup>23</sup> Na | <sup>24</sup> Mg | <sup>27</sup> Al | <sup>28</sup> Si | <sup>39</sup> K | <sup>43</sup> Ca | <sup>47</sup> Ti | <sup>51</sup> V | <sup>52</sup> Cr | <sup>55</sup> Mn | <sup>56</sup> Fe | <sup>59</sup> Co | <sup>60</sup> Ni | <sup>63</sup> Cu | <sup>66</sup> Zn |
|--------------------------------------|------------------|------------------|------------------|------------------|-----------------|------------------|------------------|-----------------|------------------|------------------|------------------|------------------|------------------|------------------|------------------|
| Certified value (Pearce et al. 1997) | 95187.05         | 465.3            | 10005.57         | 328329.15        | 486.1           | 81833.26         | 434              | 441.7           | 405.2            | 433.3            | 457.1            | 405              | 443              | 430.3            | 456.3            |
| Average (ppm)                        | 95114            | 466              | 10010            | 328329           | 486             | 81997            | 434              | 442             | 406              | 434              | 458              | 405              | 444              | 431              | 456              |
| St. Dev. (ppm)                       | 1412             | 8                | 106              | -                | 7               | 1627             | 8                | 5               | 5                | 5                | 7                | 4                | 5                | 7                | 11               |
| RSD %                                | 1.48             | 1.63             | 1.06             | 0.00             | 1.42            | 1.98             | 1.94             | 1.17            | 1.11             | 1.15             | 1.63             | 1.10             | 1.10             | 1.56             | 2.43             |
| RD %                                 | -0.08            | 0.11             | 0.05             | 0.00             | 0.04            | 0.20             | 0.05             | 0.09            | 0.08             | 0.09             | 0.16             | 0.04             | 0.10             | 0.16             | 0.04             |
| Min. Estimated DL                    | 1                | 0.02             | 0.1              | 0.01             | 2               | 59               | 0.1              | 0.01            | 0.2              | 0.1              | 1                | 0.01             | 0.04             | 0.1              | 0.1              |
| Overall avg. recovery (%)            | 100              | 100              | 100              | 100              | 100             | 100              | 100              | 100             | 100              | 100              | 100              | 100              | 100              | 100              | 100              |
| Min recovery (%)                     | 96               | 94               | 97               | 100              | 97              | 97               | 95               | 97              | 98               | 98               | 97               | 97               | 97               | 97               | 96               |
| Max recovery (%)                     | 104              | 105              | 102              | 100              | 103             | 105              | 104              | 103             | 103              | 103              | 105              | 103              | 103              | 104              | 107              |

  

| Element                              | <sup>23</sup> Na | <sup>24</sup> Mg | <sup>27</sup> Al | <sup>28</sup> Si | <sup>39</sup> K | <sup>43</sup> Ca | <sup>47</sup> Ti | <sup>51</sup> V | <sup>52</sup> Cr | <sup>55</sup> Mn | <sup>56</sup> Fe | <sup>59</sup> Co | <sup>60</sup> Ni | <sup>63</sup> Cu | <sup>66</sup> Zn |
|--------------------------------------|------------------|------------------|------------------|------------------|-----------------|------------------|------------------|-----------------|------------------|------------------|------------------|------------------|------------------|------------------|------------------|
| Certified value (Pearce et al. 1997) | 103719           | 77.44            | 11164.6          | 335916.8         | 66.26           | 85262.5          | 48.11            | 39.22           | 39.88            | 38.43            | 56.33            | 35.26            | 38.44            | 36.71            | 37.92            |
| Average (ppm)                        | 96938            | 62.4             | 10621            | 335914           | 61.0            | 88814            | 40.1             | 38.1            | 36.3             | 38.0             | 48.4             | 34.6             | 37.8             | 36.8             | 33.1             |
| St. Dev. (ppm)                       | 2335             | 2.8              | 242              | -                | 5.1             | 2000             | 2.1              | 1.2             | 1.5              | 1.7              | 2.4              | 1.2              | 1.4              | 1.3              | 2.7              |
| RSD %                                | 2.41             | 4.50             | 2.28             | 0.00             | 8.30            | 2.25             | 5.36             | 3.08            | 4.14             | 4.42             | 4.88             | 3.41             | 3.66             | 3.52             | 8.17             |
| RD %                                 | -6.54            | -19.45           | -4.87            | 0.00             | -8.01           | 4.17             | -16.73           | -2.85           | -9.02            | -1.20            | -14.01           | -1.96            | -1.66            | 0.17             | -12.78           |
| Min. estimated DL                    | 2                | 0.02             | 0.2              | 0.01             | 3               | 62               | 0.2              | 0.02            | 0.3              | 0.2              | 2                | 0.02             | 0.03             | 0.1              | 0.1              |
| Overall avg. recovery (%)            | 93               | 81               | 95               | 100              | 92              | 104              | 83               | 97              | 91               | 99               | 86               | 98               | 98               | 100              | 87               |
| Min recovery                         | 89               | 72               | 90               | 100              | 70              | 98               | 76               | 88              | 80               | 88               | 79               | 89               | 90               | 93               | 73               |
| Max recovery                         | 97               | 86               | 99               | 100              | 103             | 109              | 93               | 102             | 99               | 106              | 94               | 103              | 107              | 107              | 100              |

Table S1 (continued). Results of LA-ICP-MS analyses of NIST610 (n = 60) and NIST612 (n = 36) reference materials, including average measured values (ppm), standard deviations (ppm), RSD (%) and RD (%) calculated after D'Oriano et al. [124], minimum estimated detection limits (DL), and recovery rates relative to certified values [125]. Certified values reported from Pearce et al. 1997 [125].

| NIST610 (n = 60) | Element                              | <sup>75</sup> As | <sup>85</sup> Rb | <sup>88</sup> Sr | <sup>89</sup> Y | <sup>90</sup> Zr | <sup>93</sup> Nb | <sup>118</sup> Sn | <sup>121</sup> Sb | <sup>137</sup> Ba | <sup>139</sup> La | <sup>140</sup> Ce | <sup>141</sup> Pr | <sup>146</sup> Nd | <sup>147</sup> Sm | <sup>153</sup> Eu |
|------------------|--------------------------------------|------------------|------------------|------------------|-----------------|------------------|------------------|-------------------|-------------------|-------------------|-------------------|-------------------|-------------------|-------------------|-------------------|-------------------|
|                  | Certified value (Pearce et al. 1997) | 317.4            | 431.1            | 497.4            | 449.9           | 439.9            | 419.4            | 396.3             | 368.5             | 424.1             | 457.4             | 447.8             | 429.8             | 430.8             | 450.5             | 461.1             |
|                  | Average (ppm)                        | 318              | 431              | 498              | 450             | 441              | 420              | 397               | 369               | 425               | 457               | 448               | 430               | 431               | 451               | 461               |
|                  | St. Dev. (ppm)                       | 5                | 5                | 11               | 6               | 5                | 4                | 5                 | 6                 | 6                 | 6                 | 6                 | 6                 | 5                 | 6                 | 8                 |
|                  | RSD %                                | 1.48             | 1.19             | 2.12             | 1.22            | 1.20             | 1.04             | 1.27              | 1.69              | 1.44              | 1.24              | 1.26              | 1.29              | 1.24              | 1.42              | 1.84              |
|                  | RD %                                 | 0.15             | 0.07             | 0.04             | 0.09            | 0.14             | 0.06             | 0.07              | 0.07              | 0.12              | 0.01              | -0.02             | -0.02             | 0.02              | 0.03              | 0.04              |
|                  | Min. Estimated DL                    | 0.2              | 0.03             | 0.003            | 0.002           | 0.003            | 0.001            | 0.02              | 0.03              | 0.02              | 0.002             | 0.001             | 0.001             | 0.01              | 0.01              | 0.002             |
|                  | Overall avg. recovery (%)            | 100              | 100              | 100              | 100             | 100              | 100              | 100               | 100               | 100               | 100               | 100               | 100               | 100               | 100               | 100               |
|                  | Min recovery (%)                     | 97               | 97               | 88               | 97              | 96               | 97               | 97                | 95                | 98                | 98                | 96                | 97                | 96                | 97                | 92                |
|                  | Max recovery (%)                     | 104              | 103              | 105              | 103             | 103              | 103              | 103               | 104               | 104               | 104               | 103               | 103               | 102               | 103               | 105               |
| NIST612 (n = 36) | Element                              | <sup>75</sup> As | <sup>85</sup> Rb | <sup>88</sup> Sr | <sup>89</sup> Y | <sup>90</sup> Zr | <sup>93</sup> Nb | <sup>118</sup> Sn | <sup>121</sup> Sb | <sup>137</sup> Ba | <sup>139</sup> La | <sup>140</sup> Ce | <sup>141</sup> Pr | <sup>146</sup> Nd | <sup>147</sup> Sm | Eu <sup>153</sup> |
|                  | Certified value (Pearce et al. 1997) | 37.33            | 31.63            | 76.15            | 38.25           | 35.99            | 38.06            | 37.96             | 38.44             | 37.74             | 35.77             | 38.35             | 37.16             | 35.24             | 36.72             | 34.44             |
|                  | Average (ppm)                        | 31.3             | 31.7             | 78.6             | 38.7            | 38.9             | 34.9             | 33.8              | 29.4              | 38.2              | 38.5              | 38.9              | 36.9              | 36.6              | 38.8              | 37.7              |
|                  | St. Dev. (ppm)                       | 0.9              | 0.9              | 2.6              | 1.3             | 1.4              | 1.5              | 0.9               | 4.3               | 1.5               | 1.4               | 1.3               | 1.2               | 0.7               | 1.1               | 1.5               |
|                  | RSD %                                | 2.96             | 2.76             | 3.36             | 3.28            | 3.54             | 4.44             | 2.60              | 14.69             | 3.85              | 3.54              | 3.35              | 3.16              | 2.04              | 2.93              | 4.08              |
|                  | RD %                                 | -16.03           | 0.31             | 3.19             | 1.12            | 8.10             | -8.37            | -11.08            | -23.44            | 1.35              | 7.50              | 1.36              | -0.61             | 3.90              | 5.54              | 9.34              |
|                  | Min. Estimated DL                    | 0.3              | 0.1              | 0.01             | 0.003           | 0.004            | 0.002            | 0.009             | 0.045             | 0.1               | 0.002             | 0.003             | 0.002             | 0.02              | 0.02              | 0.005             |
|                  | Overall avg. recovery (%)            | 84               | 100              | 103              | 101             | 108              | 92               | 89                | 77                | 101               | 108               | 101               | 99                | 104               | 106               | 109               |
|                  | Min recovery                         | 79               | 91               | 93               | 93              | 98               | 79               | 85                | 12                | 92                | 96                | 90                | 89                | 100               | 98                | 96                |
|                  | Max recovery                         | 91               | 105              | 108              | 106             | 113              | 97               | 93                | 84                | 110               | 113               | 107               | 104               | 108               | 113               | 114               |

Table S1 (continued). Results of LA-ICP-MS analyses of NIST610 (n = 60) and NIST612 (n = 36) reference materials, including average measured values (ppm), standard deviations (ppm), RSD (%) and RD (%) calculated after D'Oriano et al. [124], minimum estimated detection limits (DL), and recovery rates relative to certified values [125]. Certified values reported from Pearce et al. 1997 [125].

| NIST610 (n = 60) | Element                              | <sup>157</sup> Gd | <sup>159</sup> Tb | <sup>163</sup> Dy | <sup>165</sup> Ho | <sup>166</sup> Er | <sup>169</sup> Tm | <sup>172</sup> Yb | <sup>175</sup> Lu | <sup>178</sup> Hf | <sup>181</sup> Ta | <sup>208</sup> Pb | <sup>232</sup> Th | <sup>238</sup> U |
|------------------|--------------------------------------|-------------------|-------------------|-------------------|-------------------|-------------------|-------------------|-------------------|-------------------|-------------------|-------------------|-------------------|-------------------|------------------|
|                  | Certified value (Pearce et al. 1997) | 419.9             | 442.8             | 426.5             | 449.4             | 426               | 420.1             | 461.5             | 434.7             | 417.7             | 376.6             | 413.3             | 450.6             | 457.1            |
|                  | Average (ppm)                        | 420               | 443               | 427               | 450               | 426               | 420               | 462               | 435               | 418               | 377               | 413               | 451               | 457              |
|                  | St. Dev. (ppm)                       | 6                 | 6                 | 6                 | 7                 | 6                 | 6                 | 7                 | 7                 | 6                 | 6                 | 8                 | 6                 | 6                |
|                  | RSD %                                | 1.37              | 1.29              | 1.34              | 1.55              | 1.37              | 1.49              | 1.51              | 1.65              | 1.36              | 1.65              | 1.87              | 1.24              | 1.29             |
|                  | RD %                                 | 0.04              | 0.01              | 0.04              | 0.08              | 0.11              | 0.06              | 0.12              | 0.10              | 0.10              | 0.04              | 0.01              | 0.08              | 0.05             |
|                  | Min. Estimated DL                    | 0.01              | 0.001             | 0.01              | 0.001             | 0.01              | 0.001             | 0.01              | 0.002             | 0.01              | 0.001             | 0.01              | 0.002             | 0.002            |
|                  | Overall avg. recovery (%)            | 100               | 100               | 100               | 100               | 100               | 100               | 100               | 100               | 100               | 100               | 100               | 100               | 100              |
|                  | Min recovery                         | 97                | 97                | 97                | 97                | 98                | 97                | 97                | 97                | 97                | 97                | 96                | 97                | 97               |
|                  | Max recovery                         | 103               | 104               | 103               | 105               | 104               | 105               | 104               | 105               | 105               | 106               | 105               | 104               | 103              |
| NIST612 (n = 36) | Element                              | <sup>157</sup> Gd | <sup>159</sup> Tb | <sup>163</sup> Dy | <sup>165</sup> Ho | <sup>166</sup> Er | <sup>169</sup> Tm | <sup>172</sup> Yb | <sup>175</sup> Lu | <sup>178</sup> Hf | <sup>181</sup> Ta | <sup>208</sup> Pb | <sup>232</sup> Th | <sup>238</sup> U |
|                  | Certified value (Pearce et al. 1997) | 36.95             | 35.92             | 35.97             | 37.87             | 37.43             | 37.55             | 39.95             | 37.71             | 34.77             | 39.77             | 38.96             | 37.23             | 37.15            |
|                  | Average (ppm)                        | 36.9              | 38.6              | 36.4              | 39.3              | 37.6              | 36.9              | 41.0              | 37.4              | 37.0              | 31.8              | 35.2              | 38.4              | 37.6             |
|                  | St. Dev. (ppm)                       | 1.2               | 1.3               | 1.1               | 1.5               | 1.2               | 1.4               | 1.2               | 1.6               | 1.1               | 1.5               | 0.8               | 1.6               | 1.3              |
|                  | RSD %                                | 3.32              | 3.45              | 2.90              | 3.85              | 3.11              | 3.85              | 2.93              | 4.36              | 2.85              | 4.61              | 2.41              | 4.24              | 3.57             |
|                  | RD %                                 | -0.27             | 7.51              | 1.26              | 3.78              | 0.52              | -1.73             | 2.50              | -0.73             | 6.34              | -20.11            | -9.60             | 3.13              | 1.15             |
|                  | Min. Estimated DL                    | 0.01              | 0.002             | 0.01              | 0.002             | 0.01              | 0.004             | 0.01              | 0.002             | 0.01              | 0.002             | 0.01              | 0.003             | 0.1              |
|                  | Overall avg. recovery (%)            | 100               | 108               | 101               | 104               | 101               | 98                | 103               | 99                | 106               | 80                | 90                | 103               | 101              |
|                  | Min recovery (%)                     | 90                | 96                | 95                | 92                | 94                | 88                | 93                | 85                | 98                | 69                | 85                | 91                | 92               |
|                  | Max recovery (%)                     | 104               | 113               | 107               | 110               | 108               | 104               | 108               | 105               | 113               | 84                | 94                | 109               | 107              |

Table S2. VP-SEM-EDS measurements of the analysed black-appearing beads. All results normalised to sum of oxides. \* polished samples

| sample  | Na <sub>2</sub> O | MgO   | Al <sub>2</sub> O <sub>3</sub> | SiO <sub>2</sub> | P <sub>2</sub> O <sub>5</sub> | SO <sub>3</sub> | Cl    | K <sub>2</sub> O | CaO  | TiO <sub>2</sub> | MnO   | FeO   | CuO   | Sb <sub>2</sub> O <sub>3</sub> | SnO <sub>2</sub> | PbO   |
|---------|-------------------|-------|--------------------------------|------------------|-------------------------------|-----------------|-------|------------------|------|------------------|-------|-------|-------|--------------------------------|------------------|-------|
| VC11bl  | 2.8               | 3.2   | 3.2                            | 58.9             | < 0.1                         | 0.4             | < 0.1 | < 0.1            | 5.9  | 0.5              | < 0.1 | 19.7  | 5.3   | < 0.1                          | < 0.1            | < 0.1 |
| VC11w   | 0.2               | 0.5   | 0.8                            | 77.9             | < 0.1                         | < 0.1           | 0.9   | < 0.1            | 7.2  | < 0.1            | < 0.1 | 2.2   | < 0.1 | 10.3                           | < 0.1            | < 0.1 |
| VC16bl  | 1.9               | 3.5   | 5.5                            | 62.1             | < 0.1                         | 1.0             | < 0.1 | < 0.1            | 9.9  | 1.7              | < 0.1 | 14.4  | < 0.1 | < 0.1                          | < 0.1            | < 0.1 |
| VC16w   | 1.4               | 1.4   | 2.1                            | 75.8             | < 0.1                         | 1.9             | 1.2   | 1.5              | 12.1 | < 0.1            | < 0.1 | 2.6   | < 0.1 | < 0.1                          | < 0.1            | < 0.1 |
| VC24bl* | 16.0              | 0.4   | 0.4                            | 66.4             | < 0.1                         | < 0.1           | 1.1   | 0.3              | 9.4  | < 0.1            | < 0.1 | 6.0   | < 0.1 | < 0.1                          | < 0.1            | < 0.1 |
| VC24w*  | 0.2               | 0.4   | 0.5                            | 77.4             | < 0.1                         | 0.3             | 0.7   | 0.1              | 7.8  | < 0.1            | < 0.1 | 0.5   | < 0.1 | 11.9                           | 0.2              | < 0.1 |
| VC26bl  | < 0.1             | < 0.1 | 0.4                            | 62.2             | < 0.1                         | 1.4             | 0.2   | < 0.1            | 17.4 | 0.4              | < 0.1 | 14.0  | 3.6   | 0.4                            | < 0.1            | < 0.1 |
| VC26w   | 1.0               | 1.1   | 2.0                            | 81.0             | < 0.1                         | 0.3             | 0.9   | 0.1              | 9.2  | < 0.1            | < 0.1 | 4.0   | < 0.1 | 0.4                            | < 0.1            | < 0.1 |
| VC28bl  | 2.3               | 0.8   | 7.3                            | 76.0             | < 0.1                         | < 0.1           | 0.7   | 1.2              | 6.8  | 0.1              | < 0.1 | 4.1   | 0.2   | 0.5                            | < 0.1            | < 0.1 |
| VC28w   | 1.3               | 0.9   | 5.3                            | 75.0             | 0.1                           | 0.1             | 0.3   | 0.4              | 7.1  | < 0.1            | < 0.1 | 2.2   | 0.4   | 6.9                            | < 0.1            | < 0.1 |
| VC30bl  | 1.2               | 0.9   | 2.5                            | 68.8             | 0.3                           | 0.7             | 0.1   | < 0.1            | 7.8  | < 0.1            | < 0.1 | 12.8  | 1.7   | 2.0                            | 1.2              | < 0.1 |
| VC30w   | 1.3               | 0.6   | 2.7                            | 75.2             | < 0.1                         | 0.5             | 0.1   | 0.0              | 7.1  | < 0.1            | < 0.1 | 2.4   | < 0.1 | 10.1                           | < 0.1            | < 0.1 |
| VC36bl  | 1.5               | 2.7   | 2.6                            | 74.4             | 0.2                           | 0.4             | 0.7   | 0.6              | 7.4  | 0.2              | < 0.1 | 8.3   | 1.0   | < 0.1                          | < 0.1            | < 0.1 |
| VC36w   | 0.2               | 0.6   | 1.0                            | 83.5             | < 0.1                         | < 0.1           | 0.6   | < 0.1            | 9.9  | < 0.1            | < 0.1 | 0.6   | < 0.1 | 3.6                            | < 0.1            | < 0.1 |
| VC39bl  | 2.0               | 1.4   | 7.2                            | 72.4             | 0.1                           | 0.1             | 0.2   | 0.2              | 7.7  | 0.2              | < 0.1 | 7.1   | 1.4   | < 0.1                          | < 0.1            | < 0.1 |
| VC39w   | 0.5               | 0.4   | 2.3                            | 84.2             | < 0.1                         | 0.3             | 0.2   | < 0.1            | 6.5  | 0.1              | < 0.1 | 2.2   | < 0.1 | 3.3                            | < 0.1            | < 0.1 |
| VC45bl  | 1.0               | 1.3   | 2.1                            | 77.9             | 0.5                           | 1.0             | 0.2   | 0.5              | 9.2  | 0.2              | < 0.1 | 5.4   | 0.7   | < 0.1                          | < 0.1            | < 0.1 |
| VC45w   | 1.9               | 1.5   | 3.6                            | 73.7             | 0.5                           | 3.8             | 0.5   | 0.7              | 6.6  | 0.3              | < 0.1 | 3.9   | 0.5   | 2.3                            | < 0.1            | < 0.1 |
| VC46bl  | < 0.1             | < 0.1 | 0.9                            | 74.2             | < 0.1                         | 0.3             | 0.5   | 0.3              | 9.9  | < 0.1            | < 0.1 | 12.8  | 1.1   | < 0.1                          | < 0.1            | < 0.1 |
| VC46w   | < 0.1             | 0.3   | 0.9                            | 81.6             | < 0.1                         | < 0.1           | 1.3   | < 0.1            | 9.2  | < 0.1            | < 0.1 | 0.9   | < 0.1 | 5.6                            | < 0.1            | < 0.1 |
| VC47bl  | 1.4               | 2.4   | 2.6                            | 77.4             | < 0.1                         | 0.6             | < 0.1 | < 0.1            | 4.3  | < 0.1            | < 0.1 | 10.3  | 1.0   | < 0.1                          | < 0.1            | < 0.1 |
| VC47w   | 1.7               | 1.8   | 2.1                            | 80.9             | < 0.1                         | 0.3             | 0.3   | < 0.1            | 6.1  | < 0.1            | < 0.1 | 1.6   | < 0.1 | 5.2                            | < 0.1            | < 0.1 |
| VC48bl  | 0.9               | 1.2   | 1.7                            | 81.9             | < 0.1                         | 0.1             | 0.6   | < 0.1            | 9.0  | < 0.1            | < 0.1 | 4.6   | < 0.1 | < 0.1                          | < 0.1            | < 0.1 |
| VC48w   | 1.1               | 1.3   | 1.8                            | 79.9             | < 0.1                         | < 0.1           | 0.8   | < 0.1            | 9.2  | < 0.1            | < 0.1 | 1.2   | < 0.1 | 4.6                            | < 0.1            | < 0.1 |
| VC51bl  | < 0.1             | < 0.1 | 0.9                            | 81.5             | < 0.1                         | 0.6             | 0.6   | < 0.1            | 9.6  | 0.6              | < 0.1 | 5.5   | 0.6   | < 0.1                          | < 0.1            | < 0.1 |
| VC51w   | 1.0               | 0.2   | 3.4                            | 73.7             | < 0.1                         | 0.6             | < 0.1 | < 0.1            | 5.7  | < 0.1            | < 0.1 | 5.8   | 1.3   | 8.3                            | < 0.1            | 1.0   |
| VC64bl  | 2.3               | 2.0   | 8.3                            | 69.3             | 0.2                           | 0.1             | 0.1   | 0.4              | 6.3  | 0.4              | < 0.1 | 10.3  | 0.3   | < 0.1                          | < 0.1            | 2.3   |
| VC64w   | 1.5               | 2.7   | 4.3                            | 63.2             | 0.1                           | < 0.1           | < 0.1 | 0.1              | 5.9  | 0.4              | < 0.1 | 11.6  | < 0.1 | 10.2                           | < 0.1            | 1.5   |
| VC67bl  | 0.5               | 0.6   | 1.3                            | 79.7             | < 0.1                         | 0.4             | 1.0   | < 0.1            | 10.7 | < 0.1            | < 0.1 | 5.6   | < 0.1 | 0.2                            | < 0.1            | 0.5   |
| VC67w   | 0.2               | 0.9   | 1.1                            | 79.6             | < 0.1                         | 0.3             | 1.3   | < 0.1            | 11.7 | < 0.1            | < 0.1 | < 0.1 | < 0.1 | 4.9                            | < 0.1            | 0.2   |
| VC77bl  | 1.1               | 2.6   | 4.8                            | 68.0             | < 0.1                         | < 0.1           | < 0.1 | < 0.1            | 6.6  | 0.3              | < 0.1 | 16.6  | < 0.1 | < 0.1                          | < 0.1            | 1.1   |
| VC77w   | 1.2               | 1.2   | 3.8                            | 80.5             | < 0.1                         | < 0.1           | 0.2   | 0.1              | 4.6  | < 0.1            | < 0.1 | 3.4   | < 0.1 | 5.0                            | < 0.1            | 1.2   |
| VC81bl  | 0.4               | 0.5   | 2.2                            | 71.4             | < 0.1                         | 0.7             | 0.2   | 0.1              | 23.4 | < 0.1            | < 0.1 | 1.1   | < 0.1 | < 0.1                          | < 0.1            | 0.4   |
| VC94bl  | 2.2               | < 0.1 | 0.4                            | 51.8             | < 0.1                         | < 0.1           | 1.1   | 0.4              | 14.4 | 0.4              | < 0.1 | 29.3  | < 0.1 | < 0.1                          | < 0.1            | 2.2   |
| VC94w   | 13.2              | 0.8   | 1.8                            | 60.5             | < 0.1                         | 0.2             | 1.0   | 0.4              | 12.2 | 0.2              | < 0.1 | 2.2   | < 0.1 | 7.5                            | < 0.1            | 13.2  |
| VC95bl  | 4.6               | 0.7   | 1.4                            | 77.5             | < 0.1                         | < 0.1           | 1.2   | 0.3              | 7.2  | 0.2              | < 0.1 | 6.9   | < 0.1 | < 0.1                          | < 0.1            | 4.6   |
| VC96bl  | 5.9               | 0.3   | 1.8                            | 71.2             | < 0.1                         | 0.3             | 0.9   | 0.3              | 13.1 | 0.7              | < 0.1 | 5.5   | < 0.1 | < 0.1                          | < 0.1            | 5.9   |

| sample   | Na <sub>2</sub> O | MgO | Al <sub>2</sub> O <sub>3</sub> | SiO <sub>2</sub> | P <sub>2</sub> O <sub>5</sub> | SO <sub>3</sub> | Cl   | K <sub>2</sub> O | CaO  | TiO <sub>2</sub> | MnO  | FeO  | CuO  | Sb <sub>2</sub> O <sub>3</sub> | SnO <sub>2</sub> | PbO  |
|----------|-------------------|-----|--------------------------------|------------------|-------------------------------|-----------------|------|------------------|------|------------------|------|------|------|--------------------------------|------------------|------|
| VC97bl   | 16.2              | 1.2 | 1.5                            | 61.3             | <0.1                          | <0.1            | 0.4  | 0.1              | 10.1 | <0.1             | <0.1 | 9.0  | <0.1 | <0.1                           | 0.2              | 16.2 |
| VC97w    | 1.2               | 1.7 | 3.8                            | 15.2             | <0.1                          | 0.2             | 0.1  | 0.3              | 72.7 | 0.4              | <0.1 | 4.4  | <0.1 | <0.1                           | <0.1             | 1.2  |
| VC109bl  | 1.9               | 0.6 | 4.9                            | 81.8             | <0.1                          | 0.5             | 0.5  | 0.8              | 4.1  | 0.2              | <0.1 | 4.0  | 0.6  | <0.1                           | <0.1             | 1.9  |
| VC109w   | 1.7               | 0.9 | 5.8                            | 68.4             | 0.2                           | 0.6             | 0.3  | 0.8              | 5.9  | <0.1             | <0.1 | 2.7  | 0.7  | 12.0                           | <0.1             | 1.7  |
| VC110bl* | 16.5              | 0.4 | 0.5                            | 68.2             | 0.3                           | 0.4             | 1.0  | 0.5              | 8.9  | 0.2              | <0.1 | 3.1  | <0.1 | <0.1                           | <0.1             | 16.5 |
| VC110w*  | 16.4              | 0.5 | 0.6                            | 65.5             | 0.2                           | 0.2             | 1.3  | 0.2              | 9.9  | <0.1             | <0.1 | 0.5  | <0.1 | 4.6                            | <0.1             | 16.4 |
| VC112bl  | 6.5               | 0.3 | 1.4                            | 70.9             | <0.1                          | 0.3             | 1.1  | 1.1              | 10.3 | <0.1             | <0.1 | 8.1  | <0.1 | <0.1                           | <0.1             | 6.5  |
| VC112w   | 0.5               | 0.8 | 2.6                            | 63.7             | <0.1                          | <0.1            | 0.2  | 0.1              | 8.2  | <0.1             | <0.1 | 11.5 | <0.1 | 12.4                           | <0.1             | 0.5  |
| VC115bl  | 0.8               | 1.3 | 1.6                            | 79.6             | <0.1                          | 0.5             | 0.5  | 0.1              | 9.6  | 0.7              | <0.1 | 5.3  | <0.1 | <0.1                           | <0.1             | 0.8  |
| VC115w   | 0.2               | 0.8 | 0.9                            | 80.2             | <0.1                          | 0.3             | 1.2  | <0.1             | 13.2 | 0.1              | <0.1 | 0.8  | <0.1 | 2.3                            | <0.1             | 0.2  |
| VC118bl  | 0.2               | 0.5 | 1.3                            | 80.2             | <0.1                          | 0.5             | 0.8  | <0.1             | 10.5 | 0.1              | <0.1 | 5.9  | <0.1 | <0.1                           | <0.1             | 0.2  |
| VC123bl  | 0.8               | 0.9 | 3.1                            | 78.9             | <0.1                          | 0.4             | 0.1  | 0.2              | 6.3  | <0.1             | <0.1 | 9.2  | <0.1 | <0.1                           | <0.1             | 0.8  |
| VC123w   | 0.5               | 0.2 | 3.2                            | 86.3             | <0.1                          | 0.1             | 0.3  | <0.1             | 3.6  | <0.1             | <0.1 | 1.0  | <0.1 | 4.7                            | <0.1             | <0.1 |
| VC129bl* | 15.9              | 0.3 | 0.5                            | 67.7             | 0.2                           | 0.2             | 1.2  | 0.2              | 8.4  | <0.1             | <0.1 | 5.4  | <0.1 | <0.1                           | <0.1             | <0.1 |
| VC129w*  | 16.2              | 0.3 | 0.4                            | 61.5             | 0.3                           | 0.2             | 1.2  | 0.2              | 8.4  | <0.1             | <0.1 | 0.3  | <0.1 | 10.9                           | <0.1             | <0.1 |
| VC132bl  | 1.2               | 1.0 | 1.5                            | 80.4             | <0.1                          | <0.1            | 1.0  | <0.1             | 8.9  | <0.1             | <0.1 | 6.0  | <0.1 | <0.1                           | <0.1             | <0.1 |
| VC132w   | 0.8               | 1.2 | 1.5                            | 79.9             | <0.1                          | <0.1            | 1.0  | <0.1             | 9.2  | <0.1             | <0.1 | 1.3  | <0.1 | 5.1                            | <0.1             | <0.1 |
| VC141bl  | 2.0               | 0.9 | 7.7                            | 78.5             | <0.1                          | 0.3             | 1.2  | 1.0              | 5.4  | <0.1             | <0.1 | 3.0  | <0.1 | <0.1                           | <0.1             | <0.1 |
| VC141w   | 0.9               | 1.1 | 3.9                            | 58.0             | <0.1                          | <0.1            | 0.1  | <0.1             | 8.0  | <0.1             | <0.1 | 6.2  | 2.0  | 19.8                           | <0.1             | <0.1 |
| VC142bl  | 0.2               | 0.4 | 4.6                            | 77.6             | <0.1                          | 0.9             | <0.1 | <0.1             | 5.4  | <0.1             | <0.1 | 10.8 | <0.1 | <0.1                           | <0.1             | <0.1 |
| VC142w   | 1.6               | 1.5 | 7.5                            | 70.9             | <0.1                          | <0.1            | 0.5  | <0.1             | 5.1  | 0.8              | <0.1 | 6.2  | <0.1 | 5.9                            | <0.1             | <0.1 |

Table S3. Crystalline phases identified by  $\mu$ -XRD.

| sample   | calcite | quartz | calcium<br>antimonate<br>(hexagonal phase) | magnetite | spinel |
|----------|---------|--------|--------------------------------------------|-----------|--------|
| VC-16bl  | *       |        | *                                          |           |        |
| VC-16w   |         |        | *                                          |           |        |
| VC-24bl  | *       |        | *                                          |           |        |
| VC-24w   | *       |        | *                                          |           |        |
| VC-30bl  | *       |        |                                            |           |        |
| VC-30w   | *       |        | *                                          |           |        |
| VC36bl   | *       |        |                                            |           |        |
| VC-36w   | *       | *      |                                            |           |        |
| VC-46w   |         |        | *                                          |           |        |
| VC-47w   | *       |        | *                                          |           |        |
| VC-48bl  | *       |        |                                            |           |        |
| VC-48w   |         |        | *                                          |           |        |
| VC-51w   |         |        | *                                          |           |        |
| VC-64bl  |         |        |                                            |           |        |
| VC-67bl  | *       | *      |                                            | *         | *      |
| VC-67w   | *       |        |                                            |           |        |
| VC-77bl  | *       |        |                                            |           |        |
| VC-77w   | *       | *      |                                            |           |        |
| VC-94w   | *       |        | *                                          |           |        |
| VC-95bl  | *       |        |                                            |           |        |
| VC-96w   | *       | *      |                                            |           |        |
| VC-109bl |         | *      |                                            |           |        |
| VC-112w  | *       |        | *                                          |           | *      |
| VC-115w  |         |        | *                                          |           |        |
| VC-123bl |         |        | *                                          |           |        |
| VC-123w  |         |        | *                                          |           |        |
| VC-129bl |         |        | *                                          |           |        |
| VC-129w  |         |        | *                                          |           |        |
| VC-132w  |         |        | *                                          |           |        |
| VC-141bl |         | *      |                                            |           |        |

Table S4. Average trace element concentrations (in ppm) for the four black-appearing colourant groups. LA-ICP-MS measurements.

| colourant     |              |            | decoration type |       |       | Ti   | V    | Cr   | Mn   | Co   | Ni   | Cu   | Zn   | As   | Rb   | Sr   | Y    | Zr   | Nb | Sn | Sb |
|---------------|--------------|------------|-----------------|-------|-------|------|------|------|------|------|------|------|------|------|------|------|------|------|----|----|----|
| black Group 1 | wavy line    | avg (N=12) | 435             | 7.57  | 10.8  | 518  | 8.35 | 6.47 | 122  | 16.0 | 4.59 | 5.01 | 240  | 5.65 | 94.9 | 1.28 | 13.4 | 132  |    |    |    |
|               |              | SD         | 57              | 1.08  | 1.1   | 58   | 2.16 | 2.17 | 78   | 4.2  | 2.11 | 1.19 | 16   | 0.32 | 12.3 | 0.16 | 32.1 | 147  |    |    |    |
| black Group 2 | "pseudo-eye" | avg (N=7)  | 723             | 10.5  | 15.5  | 246  | 4.62 | 4.56 | 184  | 13.4 | 10.5 | 9.84 | 263  | 5.65 | 150  | 2.06 | 4.10 | 17.2 |    |    |    |
|               |              | SD         | 196             | 2.6   | 4.2   | 74   | 1.35 | 0.94 | 130  | 5.7  | 3.2  | 2.50 | 54   | 0.70 | 57   | 0.54 | 6.67 | 15.0 |    |    |    |
| black Group 3 | "eye"        | avg (N=6)  | 518             | 8.96  | 14.9  | 120  | 20.6 | 17.9 | 24.7 | 8.72 | 2.17 | 2.50 | 207  | 4.49 | 103  | 1.52 | 1.07 | 2475 |    |    |    |
|               |              | SD         | 208             | 3.04  | 6.8   | 26   | 8.0  | 5.9  | 20.8 | 2.36 | 1.60 | 0.76 | 32   | 0.57 | 93   | 0.58 | 1.03 | 2479 |    |    |    |
| black Group 4 | various      | avg (N=5)  | 855             | 16.3  | 17.7  | 161  | 7.31 | 5.28 | 140  | 63.6 | 105  | 6.80 | 2694 | 7.32 | 155  | 2.60 | 19.6 | 3750 |    |    |    |
|               |              | SD         | 201             | 8.6   | 6.2   | 77   | 8.23 | 1.92 | 93   | 35.6 | 79   | 1.40 | 35   | 0.93 | 40   | 0.77 | 18.6 | 4868 |    |    |    |
| outlier       | other        | VC-11bl    | 481             | 4.77  | 13.2  | 65.3 | 6.83 | 6.29 | 24.5 | 4.04 | 0.66 | 1.05 | 159  | 3.40 | 112  | 1.35 | 0.44 | 14.3 |    |    |    |
|               |              | SD         | -               | -     | -     | --   | -    | -    | --   | -    | --   | -    | -    | --   | -    | --   | -    | -    | -  |    |    |
| colourant     |              |            | decoration type |       |       | Ba   | Ba   | La   | Ce   | Pr   | Nd   | Sm   | Eu   | Gd   | Tb   | Dy   | Ho   | Er   | Tm | Yb | Lu |
| black Group 1 | wavy line    | avg (N=12) | 50.1            | 6.42  | 7.84  | 1.28 | 5.38 | 0.99 | 0.24 | 0.91 | 0.13 | 0.83 | 0.17 | 0.48 | 0.07 | 0.47 | 0.06 | 2.21 |    |    |    |
|               |              | SD         | 7.2             | 0.42  | 0.80  | 0.09 | 0.33 | 0.10 | 0.03 | 0.09 | 0.02 | 0.05 | 0.02 | 0.04 | 0.01 | 0.05 | 0.01 | 0.30 |    |    |    |
| black Group 2 | "pseudo-eye" | avg (N=7)  | 130             | 6.24  | 8.40  | 1.24 | 5.49 | 1.13 | 0.25 | 0.95 | 0.14 | 0.84 | 0.18 | 0.51 | 0.07 | 0.50 | 0.08 | 3.41 |    |    |    |
|               |              | SD         | 31              | 0.92  | 1.25  | 0.17 | 0.83 | 0.18 | 0.03 | 0.16 | 0.02 | 0.13 | 0.02 | 0.08 | 0.01 | 0.08 | 0.01 | 1.25 |    |    |    |
| black Group 3 | "eye"        | avg (N=6)  | 31.8            | 4.51  | 6.51  | 0.93 | 3.96 | 0.81 | 0.20 | 0.74 | 0.11 | 0.65 | 0.14 | 0.39 | 0.05 | 0.40 | 0.06 | 2.29 |    |    |    |
|               |              | SD         | 5.3             | 0.43  | 0.85  | 0.10 | 0.47 | 0.12 | 0.02 | 0.11 | 0.01 | 0.09 | 0.02 | 0.06 | 0.01 | 0.07 | 0.02 | 1.98 |    |    |    |
| black Group 4 | various      | avg (N=5)  | 5222            | 8.42  | 10.67 | 1.64 | 6.74 | 1.26 | 0.41 | 1.13 | 0.18 | 1.13 | 0.24 | 0.63 | 0.09 | 0.64 | 0.10 | 3.57 |    |    |    |
|               |              | SD         | 4342            | 1.42  | 1.81  | 0.26 | 0.84 | 0.22 | 0.10 | 0.18 | 0.03 | 0.19 | 0.04 | 0.09 | 0.01 | 0.17 | 0.02 | 0.86 |    |    |    |
| outlier       | other        | VC-11bl    | 24.6            | 3.39  | 4.87  | 0.68 | 2.90 | 0.56 | 0.15 | 0.55 | 0.08 | 0.49 | 0.10 | 0.30 | 0.05 | 0.35 | 0.04 | 2.52 |    |    |    |
|               |              | SD         | -               | -     | -     | -    | -    | -    | -    | -    | -    | -    | -    | -    | -    | -    | -    | -    | -  |    |    |
| colourant     |              |            | decoration type |       |       | Ta   | Pb   | Th   | U    |      |      |      |      |      |      |      |      |      |    |    |    |
| black Group 1 | wavy line    | avg (N=12) | 0.08            | 8.78  | 0.84  | 1.33 |      |      |      |      |      |      |      |      |      |      |      |      |    |    |    |
|               |              | SD         | 0.01            | 12.18 | 0.12  | 0.14 |      |      |      |      |      |      |      |      |      |      |      |      |    |    |    |
| black Group 2 | "pseudo-eye" | avg (N=7)  | 0.12            | 58.7  | 1.22  | 1.23 |      |      |      |      |      |      |      |      |      |      |      |      |    |    |    |
|               |              | SD         | 0.04            | 84.5  | 0.32  | 0.12 |      |      |      |      |      |      |      |      |      |      |      |      |    |    |    |
| black Group 3 | "eye"        | avg (N=6)  | 0.10            | 42.4  | 0.61  | 1.06 |      |      |      |      |      |      |      |      |      |      |      |      |    |    |    |
|               |              | SD         | 0.05            | 65.2  | 0.13  | 0.13 |      |      |      |      |      |      |      |      |      |      |      |      |    |    |    |
| black Group 4 | various      | avg (N=5)  | 0.17            | 2828  | 1.47  | 1.72 |      |      |      |      |      |      |      |      |      |      |      |      |    |    |    |
|               |              | SD         | 0.05            | 1363  | 0.33  | 0.53 |      |      |      |      |      |      |      |      |      |      |      |      |    |    |    |
| outlier       | other        | VC-11bl    | 0.09            | 1.32  | 0.54  | 0.82 |      |      |      |      |      |      |      |      |      |      |      |      |    |    |    |
|               |              | SD         | -               | -     | --    | -    |      |      |      |      |      |      |      |      |      |      |      |      |    |    |    |

Table S5. Trace and REE element concentrations of the analysed samples (LA-ICP-MS data).

| sample  | colourant group or opacifier | Ti    | V      | Cr    | Rb     | Sr    | Y    | Zr    | Ba   | La   | Ce   | Pr    | Nd   | Sm    | Eu    | Gd    | Tb     | Dy    | Ho    | Er    | Tm     | Yb    | Lu    | Hf   | Ta    | Th    | U     |
|---------|------------------------------|-------|--------|-------|--------|-------|------|-------|------|------|------|-------|------|-------|-------|-------|--------|-------|-------|-------|--------|-------|-------|------|-------|-------|-------|
| VC-11bl | outlier                      | 480.8 | 4.77   | 13.2  | 1.05   | 159   | 3.40 | 112   | 24.6 | 3.39 | 4.87 | 0.680 | 2.90 | 0.560 | 0.150 | 0.550 | 0.080  | 0.490 | 0.100 | 0.300 | 0.050  | 0.350 | 0.040 | 2.52 | 0.090 | 0.540 | 0.820 |
| SD      |                              | 0.1   | 0.06   | 0.2   | 0.03   | 2     | 0.22 | 2     | 0.6  | 0.02 | 0.12 | 0.013 | 0.17 | 0.028 | 0.025 | 0.048 | 0.017  | 0.035 | 0.002 | 0.063 | 0.004  | 0.052 | 0.002 | 0.15 | 0.002 | 0.021 | 0.014 |
| VC-11w  | calcium antimonate           | 585   | 5.22   | 12.5  | 1.69   | 191.1 | 4.35 | 119.4 | 28.8 | 4.39 | 6.27 | 0.900 | 3.77 | 0.770 | 0.160 | 0.590 | 0.100  | 0.640 | 0.130 | 0.390 | 0.060  | 0.410 | 0.050 | 2.64 | 0.120 | 0.670 | 1.09  |
| SD      |                              | 11    | 0.07   | 0.3   | 0.05   | 0.4   | 0.04 | 0.4   | 1.9  | 0.03 | 0.04 | 0.028 | 0.47 | 0.025 | 0.034 | 0.018 | 0.008  | 0.049 | 0.010 | 0.098 | 0.007  | 0.068 | 0.003 | 0.08 | 0.013 | 0.017 | 0.01  |
| VC-16bl | Group 1                      | 403   | 6.89   | 9.390 | 4.01   | 217   | 5.20 | 83.9  | 47.2 | 5.72 | 6.93 | 1.13  | 5.29 | 0.960 | 0.210 | 0.860 | 0.110  | 0.770 | 0.150 | 0.450 | 0.060  | 0.430 | 0.060 | 2.01 | 0.070 | 0.740 | 1.27  |
| SD      |                              | 4     | 0.17   | 0.412 | 0.23   | 3     | 0.17 | 1.8   | 0.7  | 0.07 | 0.12 | 0.02  | 0.13 | 0.070 | 0.021 | 0.064 | 0.003  | 0.006 | 0.007 | 0.026 | 0.004  | 0.027 | 0.012 | 0.08 | 0.014 | 0.012 | 0.02  |
| VC-16w  | calcium antimonate           | 879   | 4.52   | 21.8  | 0.410  | 40    | 3.17 | 262   | 41.5 | 3.26 | 5.62 | 0.770 | 3.20 | 0.700 | 0.130 | 0.500 | 0.0800 | 0.530 | 0.110 | 0.320 | 0.040  | 0.340 | 0.040 | 7.76 | 0.200 | 0.880 | 0.960 |
| SD      |                              | 73    | 0.04   | 0.2   | 0.110  | 2     | 0.08 | 10    | 0.5  | 0.02 | 0.60 | 0.054 | 0.12 | 0.116 | 0.001 | 0.049 | 0.0009 | 0.093 | 0.014 | 0.042 | 0.007  | 0.061 | 0.014 | 0.56 | 0.020 | 0.015 | 0.042 |
| VC-24bl | Group 3                      | 411   | 7.23   | 11.2  | 3.41   | 221   | 4.26 | 73.5  | 35.7 | 4.37 | 6.35 | 0.910 | 3.74 | 0.720 | 0.180 | 0.700 | 0.110  | 0.590 | 0.120 | 0.350 | 0.050  | 0.380 | 0.060 | 1.64 | 0.070 | 0.570 | 1.12  |
| SD      |                              | 6     | 0.21   | 0.1   | 0.09   | 1     | 0.04 | 0.7   | 0.7  | 0.02 | 0.22 | 0.045 | 0.24 | 0.026 | 0.014 | 0.063 | 0.008  | 0.056 | 0.018 | 0.041 | 0.012  | 0.023 | 0.015 | 0.07 | 0.011 | 0.034 | 0.01  |
| VC-26bl | iron Group 2                 | 726   | 8.06   | 14.4  | 6.49   | 228   | 4.93 | 188   | 82.8 | 5.19 | 7.26 | 1.05  | 4.34 | 0.870 | 0.210 | 0.830 | 0.120  | 0.710 | 0.160 | 0.440 | 0.060  | 0.510 | 0.080 | 4.20 | 0.150 | 1.01  | 1.09  |
| SD      |                              | 4     | 0.21   | 0.5   | 0.24   | 1     | 0.13 | 1     | 2.0  | 0.10 | 0.11 | 0.01  | 0.02 | 0.049 | 0.033 | 0.161 | 0.018  | 0.045 | 0.019 | 0.041 | 0.005  | 0.078 | 0.005 | 0.13 | 0.003 | 0.03  | 0.01  |
| VC-26w  | calcium antimonate           | 1152  | 6.73   | 28.2  | 0.550  | 190   | 5.69 | 334   | 25.0 | 5.74 | 6.21 | 1.26  | 4.72 | 0.780 | 0.200 | 0.860 | 0.110  | 0.810 | 0.180 | 0.610 | 0.0700 | 0.760 | 0.120 | 7.43 | 0.260 | 0.960 | 1.43  |
| SD      |                              | 16    | 0.60   | 1.8   | 0.153  | 7     | 0.41 | 4     | 0.5  | 0.06 | 0.20 | 0.26  | 0.03 | 0.053 | 0.004 | 0.107 | 0.023  | 0.104 | 0.027 | 0.117 | 0.0001 | 0.199 | 0.045 | 0.47 | 0.040 | 0.183 | 0.03  |
| VC-28bl | Group 2                      | 594   | 9.90   | 12.2  | 10.080 | 330   | 5.72 | 96.5  | 141  | 6.07 | 8.41 | 1.19  | 5.57 | 1.18  | 0.260 | 0.930 | 0.140  | 0.880 | 0.170 | 0.500 | 0.060  | 0.480 | 0.070 | 2.36 | 0.110 | 1.10  | 1.23  |
| SD      |                              | 9     | 0.02   | 0.3   | 0.275  | 5     | 0.07 | 4.2   | 2    | 0.09 | 0.08 | 0.02  | 0.08 | 0.03  | 0.022 | 0.112 | 0.009  | 0.032 | 0.020 | 0.012 | 0.006  | 0.017 | 0.019 | 0.05 | 0.009 | 0.05  | 0.03  |
| VC-28w  | calcium antimonate           | 710   | 4.48   | 16.0  | 0.570  | 151   | 3.92 | 309   | 24.9 | 3.79 | 4.83 | 0.780 | 3.43 | 0.650 | 0.130 | 0.590 | 0.080  | 0.550 | 0.110 | 0.360 | 0.050  | 0.380 | 0.050 | 7.03 | 0.150 | 0.660 | 2.08  |
| SD      |                              | 41    | 0.09   | 0.5   | 0.081  | 29    | 0.38 | 10    | 0.8  | 0.25 | 0.09 | 0.055 | 0.18 | 0.053 | 0.025 | 0.022 | 0.011  | 0.079 | 0.015 | 0.040 | 0.008  | 0.050 | 0.013 | 0.42 | 0.021 | 0.065 | 0.18  |
| VC-30bl | Group 3                      | 641   | 9.97   | 20.7  | 2.67   | 163   | 4.55 | 113   | 32.5 | 4.54 | 6.64 | 0.920 | 3.98 | 0.820 | 0.210 | 0.800 | 0.110  | 0.680 | 0.160 | 0.420 | 0.050  | 0.420 | 0.060 | 2.50 | 0.110 | 0.700 | 1.07  |
| SD      |                              | 41    | 2.05   | 4.9   | 0.10   | 6     | 0.23 | 2     | 1.9  | 0.17 | 0.34 | 0.058 | 0.11 | 0.135 | 0.037 | 0.041 | 0.014  | 0.089 | 0.016 | 0.033 | 0.008  | 0.095 | 0.014 | 0.05 | 0.010 | 0.065 | 0.02  |
| VC-36bl | Group 2                      | 849   | 11.520 | 19.7  | 9.20   | 240   | 6.14 | 195   | 134  | 7.03 | 8.72 | 1.42  | 6.29 | 1.23  | 0.280 | 1.07  | 0.140  | 0.930 | 0.190 | 0.560 | 0.080  | 0.610 | 0.080 | 4.55 | 0.150 | 1.34  | 1.16  |
| SD      |                              | 25    | 0.196  | 0.8   | 0.42   | 11    | 0.19 | 8     | 2    | 0.33 | 0.44 | 0.12  | 0.12 | 0.10  | 0.014 | 0.13  | 0.005  | 0.057 | 0.016 | 0.010 | 0.017  | 0.089 | 0.008 | 0.33 | 0.022 | 0.03  | 0.12  |
| VC-39bl | Group 2                      | 828   | 10.810 | 17.5  | 10.040 | 251   | 5.76 | 191   | 126  | 6.23 | 8.27 | 1.20  | 5.18 | 1.02  | 0.250 | 1.02  | 0.140  | 0.870 | 0.180 | 0.470 | 0.080  | 0.510 | 0.080 | 3.82 | 0.120 | 1.15  | 1.23  |
| SD      |                              | 38    | 0.663  | 0.9   | 0.502  | 12    | 0.28 | 9     | 7    | 0.44 | 0.19 | 0.07  | 0.06 | 0.24  | 0.018 | 0.14  | 0.014  | 0.078 | 0.031 | 0.060 | 0.022  | 0.068 | 0.015 | 0.76 | 0.061 | 0.10  | 0.07  |



Table S5 (continued).. Trace and REE element concentrations of the analysed samples (LA-ICP-MS data).

| sample  | colourant group or opacifier | Ti   | V      | Cr   | Rb     | Sr  | Y    | Zr    | Ba   | La   | Ce   | Pr    | Nd   | Sm    | Eu    | Gd    | Tb    | Dy    | Ho    | Er    | Tm    | Yb    | Lu    | Hf   | Ta    | Th    | U     |
|---------|------------------------------|------|--------|------|--------|-----|------|-------|------|------|------|-------|------|-------|-------|-------|-------|-------|-------|-------|-------|-------|-------|------|-------|-------|-------|
| VC-45bl | Group 2                      | 1023 | 15.370 | 21.3 | 14.410 | 226 | 6.58 | 207   | 178  | 7.76 | 10.7 | 1.49  | 6.49 | 1.36  | 0.300 | 1.15  | 0.170 | 1.00  | 0.220 | 0.650 | 0.080 | 0.570 | 0.100 | 4.91 | 0.180 | 1.86  | 1.43  |
| SD      |                              | 41   | 2.047  | 4.9  | 0.102  | 6   | 0.23 | 2     | 2    | 0.17 | 0.3  | 0.06  | 0.11 | 0.13  | 0.037 | 0.04  | 0.014 | 0.09  | 0.016 | 0.033 | 0.008 | 0.095 | 0.014 | 0.05 | 0.010 | 0.06  | 0.02  |
| VC-46bl | Group 1                      | 446  | 8.130  | 11.6 | 5.25   | 227 | 5.53 | 92    | 50.3 | 6.39 | 7.91 | 1.24  | 5.43 | 0.940 | 0.230 | 0.990 | 0.150 | 0.870 | 0.170 | 0.490 | 0.080 | 0.380 | 0.060 | 2.16 | 0.070 | 0.830 | 1.36  |
| SD      |                              | 14   | 0.764  | 0.6  | 0.15   | 2   | 0.10 | 1     | 1.0  | 0.17 | 0.26 | 0.03  | 0.18 | 0.107 | 0.018 | 0.106 | 0.006 | 0.051 | 0.011 | 0.056 | 0.018 | 0.030 | 0.011 | 0.16 | 0.008 | 0.060 | 0.05  |
| VC-46w  | calcium antimonate           | 487  | 5.510  | 13.6 | 2.39   | 291 | 5.04 | 134   | 34.7 | 5.25 | 6.45 | 1.09  | 4.55 | 0.700 | 0.220 | 0.700 | 0.140 | 0.760 | 0.150 | 0.410 | 0.060 | 0.430 | 0.080 | 3.04 | 0.090 | 0.720 | 1.21  |
| SD      |                              | 41   | 2.047  | 4.9  | 0.10   | 6   | 0.23 | 2     | 1.9  | 0.17 | 0.34 | 0.06  | 0.11 | 0.135 | 0.037 | 0.041 | 0.014 | 0.089 | 0.016 | 0.033 | 0.008 | 0.095 | 0.014 | 0.05 | 0.010 | 0.065 | 0.02  |
| VC-47bl | Group 1                      | 412  | 7.320  | 10.4 | 3.77   | 244 | 5.70 | 93    | 46.2 | 6.57 | 7.70 | 1.31  | 5.23 | 1.01  | 0.240 | 1.01  | 0.120 | 0.780 | 0.170 | 0.460 | 0.070 | 0.500 | 0.060 | 2.18 | 0.070 | 0.810 | 1.49  |
| SD      |                              | 63   | 0.923  | 0.5  | 0.08   | 25  | 0.16 | 20    | 2.9  | 0.26 | 0.10 | 0.05  | 0.39 | 0.12  | 0.069 | 0.04  | 0.023 | 0.032 | 0.019 | 0.019 | 0.015 | 0.111 | 0.019 | 0.53 | 0.019 | 0.028 | 0.12  |
| VC-48bl | Group 1                      | 449  | 7.320  | 11.3 | 6.07   | 252 | 5.78 | 97    | 49.2 | 6.68 | 7.81 | 1.35  | 5.61 | 1.04  | 0.220 | 0.950 | 0.150 | 0.850 | 0.180 | 0.510 | 0.060 | 0.460 | 0.060 | 2.17 | 0.070 | 0.830 | 1.35  |
| SD      |                              | 33   | 0.377  | 0.4  | 0.59   | 9   | 0.24 | 3     | 2.6  | 0.18 | 0.46 | 0.08  | 0.15 | 0.10  | 0.022 | 0.055 | 0.008 | 0.100 | 0.022 | 0.042 | 0.017 | 0.025 | 0.014 | 0.08 | 0.008 | 0.103 | 0.13  |
| VC-48w  | calcium antimonate           | 719  | 10.390 | 31.3 | 2.96   | 208 | 5.21 | 161   | 45.3 | 5.91 | 7.13 | 1.23  | 4.66 | 1.12  | 0.260 | 0.750 | 0.110 | 0.940 | 0.110 | 0.320 | 0.060 | 0.490 | 0.060 | 3.61 | 0.130 | 0.980 | 1.83  |
| SD      |                              | 64   | 0.532  | 16.7 | 0.50   | 4   | 0.24 | 11    | 7.2  | 0.18 | 0.61 | 0.13  | 0.92 | 0.21  | 0.127 | 0.316 | 0.012 | 0.254 | 0.062 | 0.048 | 0.022 | 0.255 | 0.014 | 0.68 | 0.050 | 0.122 | 0.11  |
| VC-51bl | Group 4                      | 761  | 20.570 | 13.4 | 6.14   | 250 | 7.79 | 131   | 6203 | 9.73 | 10.5 | 1.87  | 7.09 | 1.38  | 0.450 | 1.30  | 0.200 | 1.18  | 0.280 | 0.640 | 0.080 | 0.650 | 0.110 | 3.05 | 0.150 | 1.47  | 1.54  |
| SD      |                              | 16   | 0.566  | 0.01 | 0.40   | 6   | 0.18 | 2     | 188  | 0.22 | 0.3  | 0.05  | 0.11 | 0.22  | 0.032 | 0.00  | 0.004 | 0.07  | 0.010 | 0.026 | 0.018 | 0.106 | 0.012 | 0.06 | 0.005 | 0.04  | 0.08  |
| VC-51w  | calcium antimonate           | 928  | 19.7   | 66.0 | 4.85   | 244 | 7.81 | 224.2 | 5178 | 9.31 | 11.9 | 1.78  | 9.11 | 1.34  | 0.410 | 1.51  | 0.140 | 1.15  | 0.270 | 0.440 | 0.090 | 0.820 | 0.090 | 4.11 | 0.180 | 1.65  | 1.55  |
| SD      |                              | 50   | 1.7    | 3.8  | 0.62   | 6   | 0.81 | 0.4   | 307  | 0.55 | 0.1  | 0.01  | 1.87 | 0.35  | 0.037 | 0.08  | 0.006 | 0.20  | 0.056 | 0.007 | 0.032 | 0.134 | 0.022 | 1.07 | 0.028 | 0.08  | 0.27  |
| VC-64bl | Group 1                      | 595  | 10.3   | 13.0 | 7.55   | 263 | 6.05 | 130   | 70.6 | 6.88 | 9.90 | 1.41  | 6.02 | 1.15  | 0.270 | 0.960 | 0.150 | 0.870 | 0.210 | 0.530 | 0.070 | 0.530 | 0.070 | 3.02 | 0.110 | 1.18  | 1.06  |
| SD      |                              | 29   | 1.2    | 0.6  | 0.35   | 4   | 0.25 | 6     | 8.8  | 0.18 | 1.00 | 0.09  | 0.39 | 0.24  | 0.022 | 0.182 | 0.022 | 0.125 | 0.033 | 0.101 | 0.009 | 0.040 | 0.003 | 0.22 | 0.008 | 0.207 | 0.05  |
| VC-67bl | Group 1                      | 385  | 6.07   | 9.9  | 3.35   | 234 | 5.38 | 87.9  | 43.6 | 6.03 | 7.21 | 1.24  | 5.00 | 0.830 | 0.200 | 0.810 | 0.130 | 0.770 | 0.160 | 0.440 | 0.070 | 0.450 | 0.060 | 2.05 | 0.060 | 0.730 | 1.28  |
| SD      |                              | 6    | 0.22   | 0.5  | 0.21   | 5   | 0.07 | 1.9   | 3.3  | 0.03 | 0.21 | 0.04  | 0.17 | 0.094 | 0.007 | 0.074 | 0.002 | 0.074 | 0.018 | 0.064 | 0.004 | 0.054 | 0.007 | 0.09 | 0.009 | 0.046 | 0.05  |
| VC-77bl | Group 1                      | 415  | 7.27   | 10.2 | 5.24   | 219 | 5.30 | 87.9  | 46.5 | 6.09 | 7.33 | 1.20  | 4.94 | 0.880 | 0.270 | 0.780 | 0.100 | 0.820 | 0.180 | 0.410 | 0.070 | 0.470 | 0.060 | 1.84 | 0.060 | 0.780 | 1.18  |
| SD      |                              | 22   | 0.94   | 1.4  | 0.58   | 5   | 0.08 | 3.5   | 1.2  | 0.11 | 0.37 | 0.06  | 0.10 | 0.057 | 0.046 | 0.108 | 0.012 | 0.065 | 0.012 | 0.058 | 0.012 | 0.083 | 0.009 | 0.13 | 0.010 | 0.117 | 0.06  |
| VC-77w  | calcium antimonate           | 425  | 4.86   | 10.8 | 0.230  | 123 | 4.00 | 126   | 24.1 | 4.26 | 5.75 | 0.810 | 3.44 | 0.650 | 0.180 | 0.650 | 0.090 | 0.620 | 0.120 | 0.310 | 0.040 | 0.370 | 0.060 | 2.92 | 0.080 | 0.640 | 0.980 |
| SD      |                              | 17   | 0.21   | 0.4  | 0.054  | 21  | 0.34 | 4     | 0.8  | 0.01 | 0.38 | 0.078 | 0.32 | 0.097 | 0.026 | 0.069 | 0.022 | 0.012 | 0.010 | 0.026 | 0.011 | 0.052 | 0.005 | 0.27 | 0.015 | 0.069 | 0.072 |
| VC-81b  | Co-Cu blue                   | 598  | 6.58   | 17.1 | 13.2   | 256 | 4.81 | 183   | 49.9 | 4.81 | 6.57 | 0.950 | 4.15 | 0.910 | 0.190 | 0.810 | 0.120 | 0.720 | 0.160 | 0.460 | 0.050 | 0.370 | 0.060 | 4.05 | 0.120 | 0.800 | 1.10  |
| SD      |                              | 5    | 0.59   | 0.7  | 0.8    | 3   | 0.02 | 6     | 2.1  | 0.16 | 0.27 | 0.018 | 0.28 | 0.105 | 0.015 | 0.095 | 0.013 | 0.075 | 0.022 | 0.037 | 0.005 | 0.043 | 0.008 | 0.31 | 0.008 | 0.038 | 0.06  |
